# Supplementary material
Source: Springer Nature journal article supplement (https://www.springermedizin.de/resource/supplementary/12936_2008_757_MOESM4_ESM.pdf/9549036)

a.

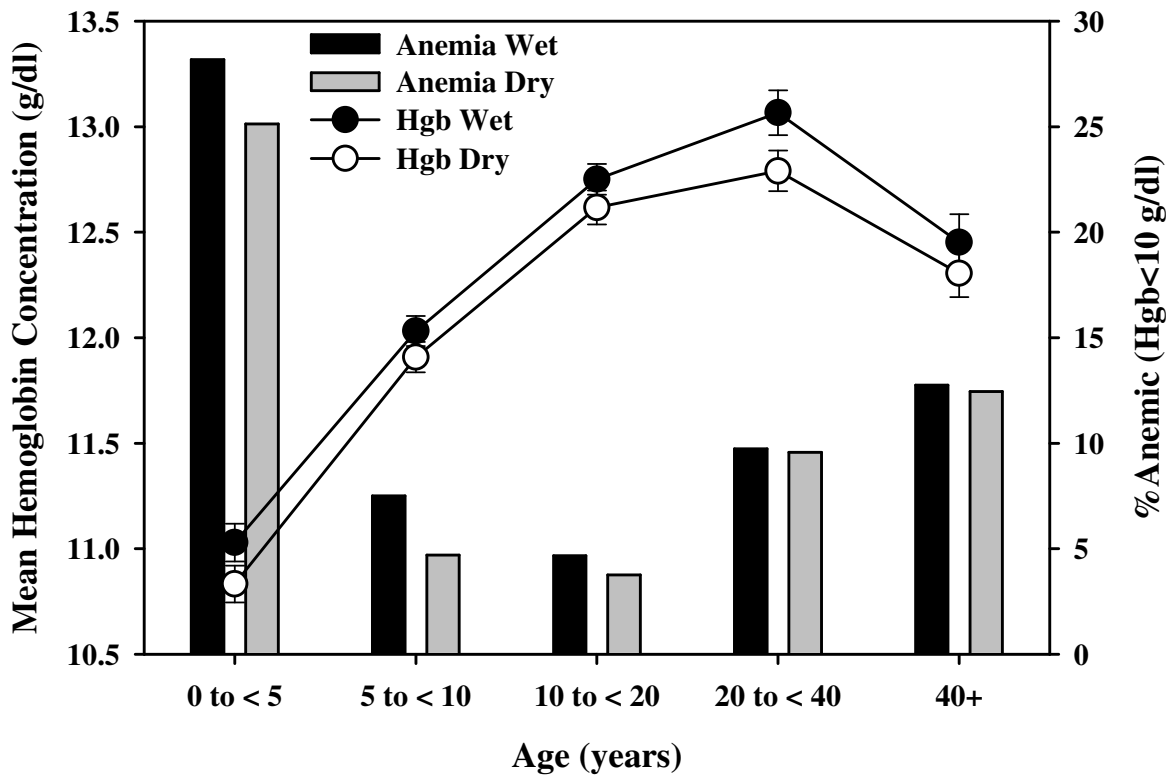

b.

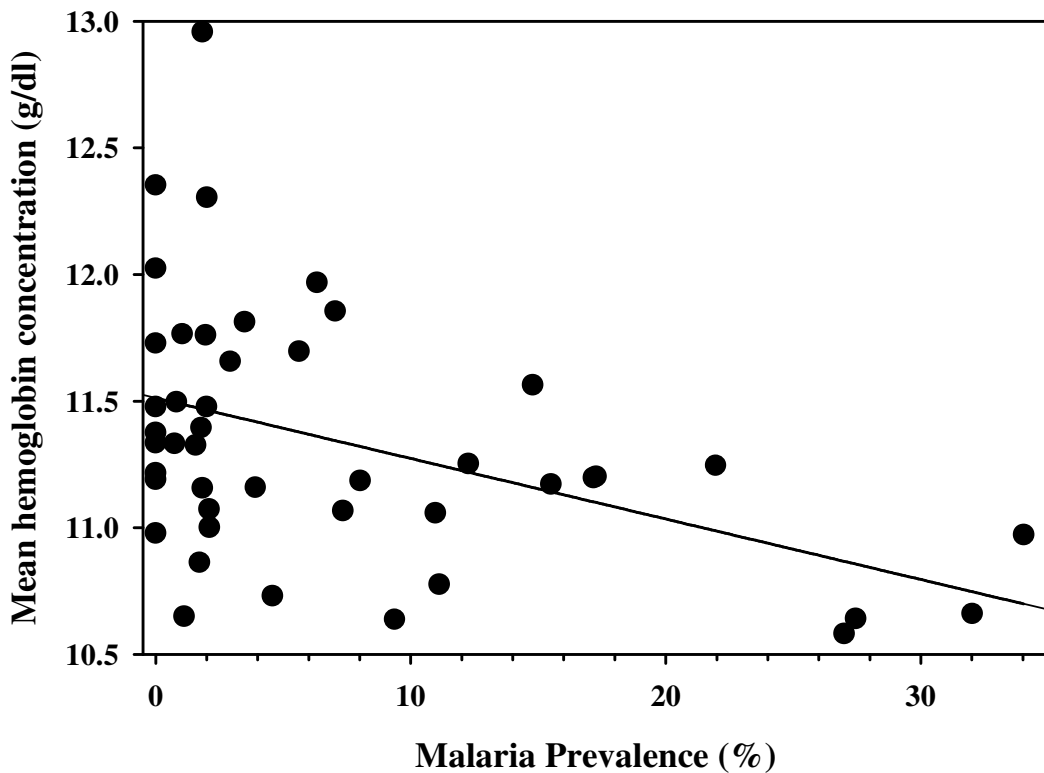

Supplement: MOESM4 [file 9549036]
